# Supplementary material
Source: PubMed Central journal article supplement (PMC4578991)
Supplement: NIHMS706891-supplement-Supp_FigureS1-S5.pdf [file NIHMS706891-supplement-Supp_FigureS1-S5.pdf]

## Clinical Characteristics Table for C-peptide versus Duration

|                           | Average<br>or<br>Total (St. Dev) | Range        | Median |
|---------------------------|----------------------------------|--------------|--------|
| <b>Number of Subject</b>  | 1,272                            | ————         | ————   |
| <b>Percent Female (%)</b> | 43.2                             | ————         | ————   |
| <b>Age (yrs)</b>          | 39.6 ( $\pm 16.7$ )              | 5.0 – 84.0   | 43.0   |
| <b>Age of Onset (yrs)</b> | 20.6 ( $\pm 14.2$ )              | 1.0 – 69.0   | 17.0   |
| <b>Duration (yrs)</b>     | 19.0 ( $\pm 14.8$ )              | 0.1 – 72.4   | 16.5   |
| <b>C-peptide (pmol/L)</b> | 53.1 ( $\pm 137.8$ )             | 2.5 – 1171.1 | 2.5    |

A

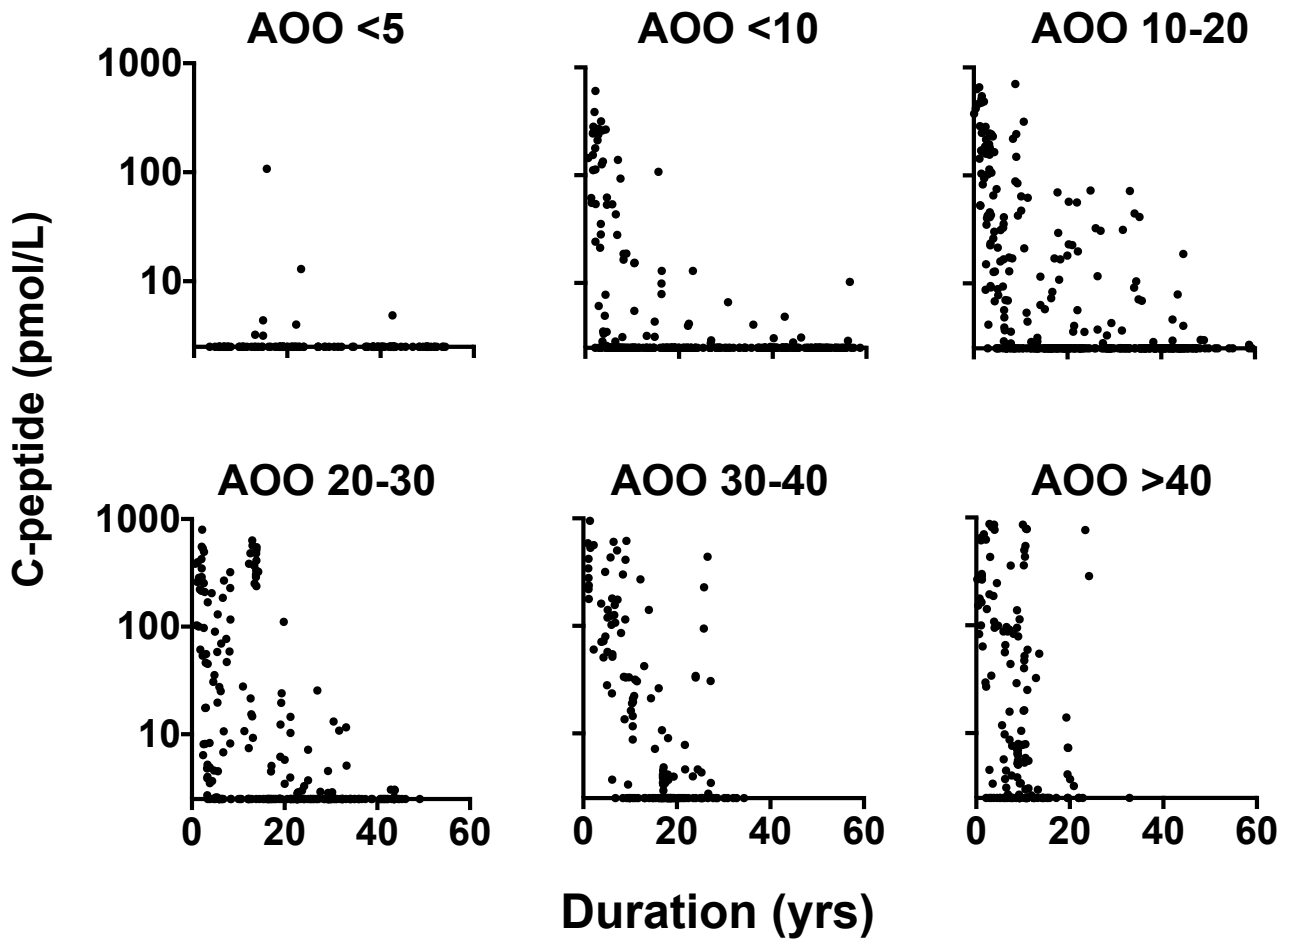

B

|              |                    |                    |                    |       |       |     |
|--------------|--------------------|--------------------|--------------------|-------|-------|-----|
| <5           |                    |                    |                    |       |       |     |
| <10          | 0.014              |                    |                    |       |       |     |
| 10-20        | $3 \times 10^{-6}$ | 0.002              |                    |       |       |     |
| 20-30        | $7 \times 10^{-6}$ | 0.002              | 0.37               |       |       |     |
| 30-40        | $1 \times 10^{-4}$ | 0.003              | 0.171              | 0.252 |       |     |
| >40          | $3 \times 10^{-8}$ | $1 \times 10^{-6}$ | $6 \times 10^{-4}$ | 0.002 | 0.016 |     |
| Age of Onset | <5                 | <10                | 10-20              | 20-30 | 30-40 | >40 |

## Clinical Characteristics for subjects in Figure 2A

|                           | Average<br>or<br>Total (St. Dev) | Range       | Median | IQR         |
|---------------------------|----------------------------------|-------------|--------|-------------|
| <b>Number of Subjects</b> | 323                              | _____       | _____  | _____       |
| <b>Percent Female (%)</b> | 47.4                             | _____       | _____  | _____       |
| <b>Age (yrs)</b>          | 40.3 ( $\pm 16.0$ )              | 9.0 – 74.0  | 41.0   | 26.0 – 54.0 |
| <b>Age of Onset (yrs)</b> | 20.7 ( $\pm 14.0$ )              | 1.0 – 60.0  | 17.0   | 8.0 - 26.5  |
| <b>Duration (yrs)</b>     | 19.6 ( $\pm 15.4$ )              | 0.1 – 70.0  | 16.0   | 9.0 – 34.0  |
| <b>C-peptide (pmol/L)</b> | 57.9 ( $\pm 149$ )               | 1.5 – 948.3 | 1.5    | 2.5 - 2.9   |

## Clinical Characteristics of subjects in Figure 2B

|                           | Average<br>or<br>Total (S.E.M.) | Range        | Median | IQR         |
|---------------------------|---------------------------------|--------------|--------|-------------|
| <b>Number of Subjects</b> | 1273                            | _____        | _____  | _____       |
| <b>Percent Female (%)</b> | 41.4                            | _____        | _____  | _____       |
| <b>Age (yrs)</b>          | 39.5 ( $\pm 0.5$ )              | 5.0 – 84.0   | 41.9   | 29.0 – 53.0 |
| <b>Age of Onset (yrs)</b> | 19.4 ( $\pm 0.4$ )              | 1.0 – 60.0   | 16.0   | 10.0 – 29.0 |
| <b>Duration (yrs)</b>     | 20.1 ( $\pm 0.4$ )              | 0.1 – 72.0   | 16.7   | 6.0 – 30.0  |
| <b>HbA1c (%)</b>          | 7.3 ( $\pm 0.03$ )              | 4.7 – 13.7   | 7.2    | 6.8 – 7.9   |
| <b>C-peptide (pmol/L)</b> | 57.3 ( $\pm 4.5$ )              | 2.5 – 1972.0 | 2.5    | 1.5 – 28.3  |

**Supplemental Figure 4**

*Hypoglycemic Survey Instructions: Please answer each question by placing an 'X' in the appropriate box.*

- 1. Check the category that best describes you: (check one only)**

|                          |                                                          |
|--------------------------|----------------------------------------------------------|
| <input type="checkbox"/> | I always have symptoms when my blood sugar is low (A)    |
| <input type="checkbox"/> | I sometimes have symptoms when my blood sugar is low (R) |
| <input type="checkbox"/> | I no longer have symptoms when my blood sugar is low (R) |

- 2. Have you lost some of the symptoms that used to occur when your blood sugar was low?**

|                          |         |
|--------------------------|---------|
| <input type="checkbox"/> | Yes (R) |
| <input type="checkbox"/> | No (A)  |

- 3. In the past six months how often have you had moderate hypoglycemia episodes? (Episodes where you might feel confused, disoriented, or lethargic and were unable to treat yourself)**

|                          |                            |
|--------------------------|----------------------------|
| <input type="checkbox"/> | Never (A)                  |
| <input type="checkbox"/> | Once or twice (R)          |
| <input type="checkbox"/> | Every other month (R)      |
| <input type="checkbox"/> | Once a month (R)           |
| <input type="checkbox"/> | More than once a month (R) |

- 4. In the past year how often have you had severe hypoglycemic episodes? (Episodes where you were unconscious or had a seizure and needed glucagon or intravenous glucose)**

|                          |                      |
|--------------------------|----------------------|
| <input type="checkbox"/> | Never (A)            |
| <input type="checkbox"/> | 1 time (R)           |
| <input type="checkbox"/> | 2 times (R)          |
| <input type="checkbox"/> | 3 times (R)          |
| <input type="checkbox"/> | 4 times (R)          |
| <input type="checkbox"/> | 5 times (R)          |
| <input type="checkbox"/> | 6 times (R)          |
| <input type="checkbox"/> | 7 times (R)          |
| <input type="checkbox"/> | 8 times (R)          |
| <input type="checkbox"/> | 9 times (R)          |
| <input type="checkbox"/> | 10 times (R)         |
| <input type="checkbox"/> | 11 times (R)         |
| <input type="checkbox"/> | 12 or more times (U) |

- 5. How often in the last month have you had readings <70mg/dL WITH symptoms?**

|                          |                   |
|--------------------------|-------------------|
| <input type="checkbox"/> | Never             |
| <input type="checkbox"/> | 1 to 3 times      |
| <input type="checkbox"/> | 1 time/week       |
| <input type="checkbox"/> | 2 to 3 times/week |
| <input type="checkbox"/> | 4 to 5 times/week |
| <input type="checkbox"/> | Almost daily      |

- 6. How often in the last month have you had readings <70mg/dL WITHOUT symptoms?**

|                          |                   |
|--------------------------|-------------------|
| <input type="checkbox"/> | Never             |
| <input type="checkbox"/> | 1 to 3 times      |
| <input type="checkbox"/> | 1 time/week       |
| <input type="checkbox"/> | 2 to 3 times/week |
| <input type="checkbox"/> | 4 to 5 times/week |
| <input type="checkbox"/> | Almost daily      |

*(Administrative use only: R= answer to #5 < answer to #6, A= answer to #6 > answer to #5)*

- 7. How low does your blood sugar need to go before you feel symptoms?**

|                          |                |
|--------------------------|----------------|
| <input type="checkbox"/> | 60-90mg/dL (A) |
| <input type="checkbox"/> | 50-59mg/dL (A) |
| <input type="checkbox"/> | 40-49mg/dL (R) |
| <input type="checkbox"/> | <40mg/dL (R)   |

- 8. To what extent can you tell by your symptoms that your blood sugar is low?**

|                          |               |
|--------------------------|---------------|
| <input type="checkbox"/> | Never (R)     |
| <input type="checkbox"/> | Rarely (R)    |
| <input type="checkbox"/> | Sometimes (R) |
| <input type="checkbox"/> | Often (A)     |
| <input type="checkbox"/> | Always (A)    |

*\* Administrative use only: Four or more R responses = reduced awareness; 2 or fewer R responses = aware.*



## Supplementary Figure 5

Clinical Characteristics Table for Hypoglycemia Survey Data in Figure 3

|                               | Average<br>or<br>Total (St. Dev) | Range       | Median |
|-------------------------------|----------------------------------|-------------|--------|
| <b>Number of<br/>Subjects</b> | 324                              | _____       | _____  |
| <b>Percent Female<br/>(%)</b> | 47.4                             | _____       | _____  |
| <b>Age (yrs)</b>              | 40.3 (±16)                       | 9 - 74      | 41     |
| <b>Age of Onset (yrs)</b>     | 20.7 (±14)                       | 1 - 60      | 17     |
| <b>Duration (yrs)</b>         | 19.6 (±15.4)                     | 0 - 70      | 16     |
| <b>C-peptide (pmol/L)</b>     | 57.9 (±149)                      | 1.5 – 948.3 | 1.5    |
